# Supplementary material for: Enhanced electrorheological performance of barium-doped SiO2/TiO2 hollow mesoporous nanospheres
Source: Royal Society of Chemistry journal article supplement (doi:10.1039/c3ra46284f), 2014-01-01
Supplement: c3ra46284f.pdf [file c3ra46284f.pdf]

Supporting Information for

**Enhanced Electrorheological Performance of Barium-Doped  
SiO<sub>2</sub>/TiO<sub>2</sub> Hollow Mesoporous Nanospheres**

Sojin Kim<sup>‡</sup>, Chanhoi Kim<sup>‡</sup>, Jin-Yong Hong, Sun Hye Hwang, and Jyongsik Jang\*

World Class University (WCU) program of Chemical Convergence for Energy & Environment  
(C2E2,) School of Chemical and Biological Engineering, College of Engineering, Seoul National  
University (SNU), Seoul, Korea.

<sup>‡</sup>These authors contributed equally to this work.

[\*] E-mail: jsjang@plaza.snu.ac.kr

Tel.: +82-2-880-7069

Fax: +82-2-888-1604

## 1. Experimental details

*Fabrication of SiO<sub>2</sub>/TiO<sub>2</sub> core/shell nanoparticles (CSNSs):* Synthesis of colloidal SiO<sub>2</sub> via Stöber method was first step in fabrication of Ba-doped SiO<sub>2</sub>/TiO<sub>2</sub> hollow nanospheres (Ba-HNSs). Tetraethyl orthosilicate (17.4 mL) was added into solution of ethanol (475 mL) and ammonia solution (23.4 mL). The mixture solution was stirred for 12 h at 60 °C. After the synthesis, 175 mL of acetonitrile was added to as-prepared colloidal SiO<sub>2</sub>. Then, 21.6 mL of titanium (IV) isopropoxide (TTIP), 108 mL of ethanol, and 36 mL of acetonitrile were mixed. The mixed solution was reacted with the colloidal SiO<sub>2</sub> at 5 °C for 12 h.

*Fabrication of Ba-doped SiO<sub>2</sub>/TiO<sub>2</sub> hollow nanoparticles (Ba-HNSs):* SiO<sub>2</sub>/TiO<sub>2</sub> core/shell nanospheres were precipitated by centrifugation and supernatant was removed. The SiO<sub>2</sub>/TiO<sub>2</sub> core/shell nanospheres were re-dispersed in Ba(OH)<sub>2</sub> aqueous solution of 500 mL (0.1 M) and treated with sonication for 3 h. Re-deposition of etched silica occurred under basic condition, resulting Ba-HNSs. After the reaction, the Ba-HNSs were isolated from the solution by centrifugation (Mega 17R, Hanil Science and Industrial) and re-dispersed in deionized water. It was repeated for washing excessive Ba(OH)<sub>2</sub> on surface of Ba-HNSs.

*Preparation of ER fluids:* Prepared Ba-HNSs were dried in a vacuum oven at 60 °C for 24 h to remove moisture. Then, the Ba-HNSs were dispersed in silicon oil (poly(methylphenylsiloxane), viscosity = 100 cSt). Concentration of ER fluid was 15 vol% and no additives were added to the ER fluid. For uniform dispersion of Ba-HNSs in the silicon oil, the ER fluid was milled for 30 min. ER fluid of HNS and commercial BaTiO<sub>3</sub> nanopowder (Sigma-Aldrich) was also prepared by the same method.

*Electrorheological properties of ER fluids:* The ER properties of the Ba-HNS and commercial BaTiO<sub>3</sub> nanopowder based ER fluids were examined respectively *via* rheometer (AR 2000 Advanced Rheometer, TA Instruments) with a concentric cylinder conical geometry of 15 mm cup radius, a high-voltage generator (Trek 677B), and a temperature controller. All measurements were made at a room temperature. To start a run, an ER fluid is placed between cup and rotor with a gap distance of 1.00 mm, and DC voltage is applied to the plate. An electric field was applied for 3 min to obtain an equilibrium chain-like or columnar structure before applying shear. If chain-like structure is constructed between rotor and cup, that force is equal to force of destroying chain-like structure between rotor and cup by rotating rotor. Therefore, by measuring shear rate of rotor, the shear stress (dynamic yield stress) of ER fluids can be determined.

## 2. Large quantity of Ba-HNS in a laboratory-scale synthesis

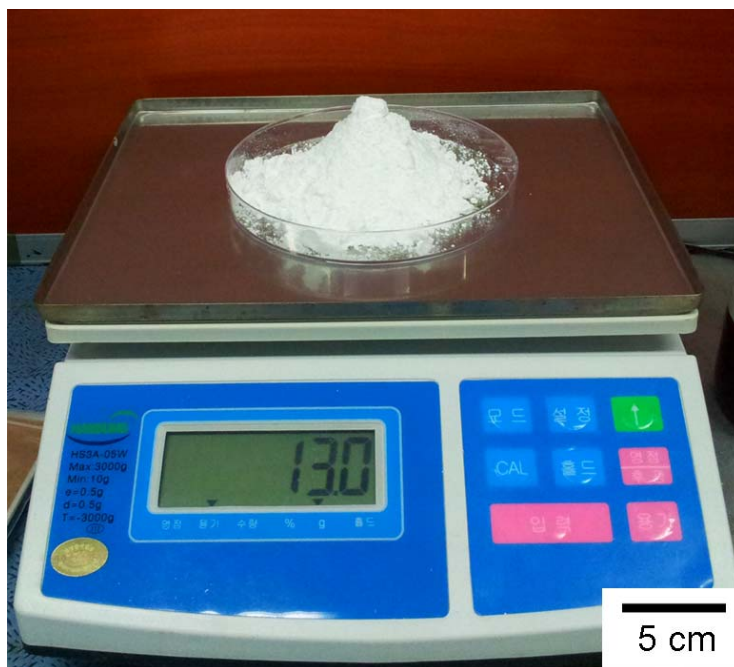

**Fig. S1** TEM images of the HNPs fabricated by the same method for Ba-HNSs except that  $\text{Ba}^{2+}$  ions were alternated with  $\text{NH}_4^+$  ions.

Fig. S1 displays a photograph showing ca. 13 g of Ba-HNSs prepared at once, a very large quantity in a laboratory-scale synthesis. By facile and large scale production of the nanostructure, our suggested ER system was proved to be readily applied for a practical use.

### 3. A TEM image of HNPs

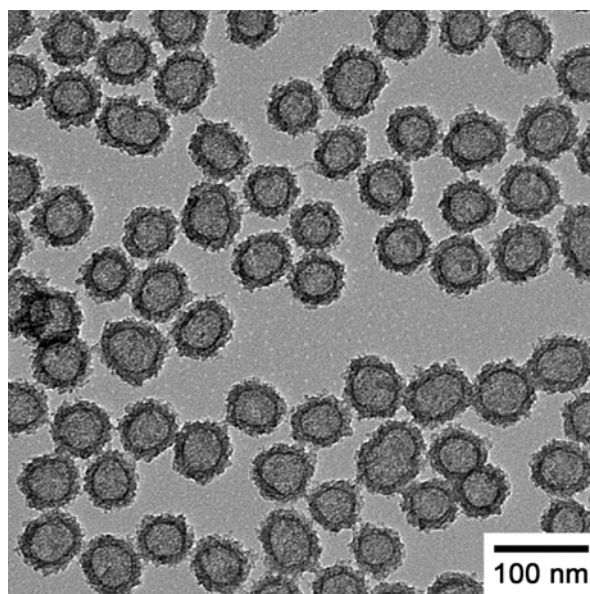

**Fig. S2** TEM images of the HNPs fabricated by the same method for Ba-HNSs except that  $\text{Ba}^{2+}$  ions were alternated with  $\text{NH}_4^+$  ions.

HNSs were fabricated by the same method for Ba-HNSs except that  $\text{Ba}^{2+}$  ions were alternated with  $\text{NH}_4^+$  ions, and their TEM image was shown in Fig. S2. Like Ba-HNS, HNSs had spherical shape with hollow core and mesoporous shell. The particle size and large inner cavity (hollow core) of HNS were almost the same as those of Ba-HNS.

#### 4. Atomic ratios determined by EDS analysis

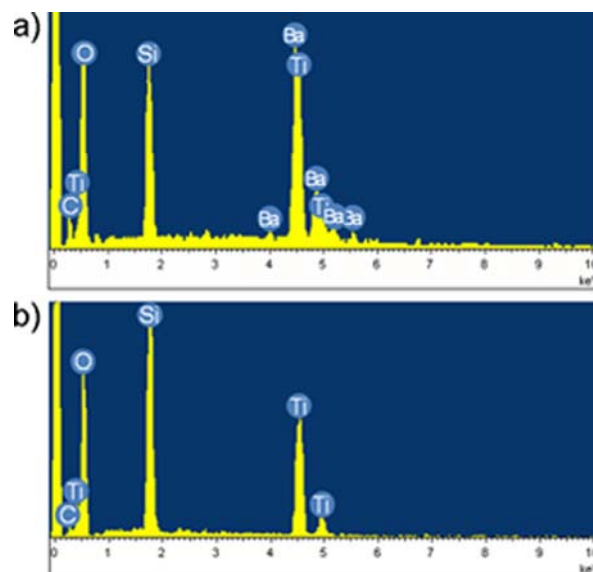

**Fig. S3** Energy-disperse X-ray spectroscopy (EDS) spectra of a) the Ba-HNSs and b) the HNSs. The signal of carbon originated from the carbon tape to fix the samples.

**Table S1.** Elemental contents of Ba-HNS and HNS by EDX analysis.

| Sample | Ti<br>/atomic % | Si<br>/atomic % | Ba<br>/atomic % |
|--------|-----------------|-----------------|-----------------|
| Ba-HNS | 36.18           | 33.49           | 30.33           |
| HNS    | 50.77           | 49.23           | 0               |

<sup>a</sup>Carbon and oxygen contents were excluded because they originated from carbon tape to fix Ba-HNS and HNS.

Based on the EDS results, the atomic ratio was calculated as Table S1. The atomic ratio of HNS was 50.77:49.23 for Si:Ti, while that of Ba-HNP was 36.18:33.49:30.33 for Si:Ti:Ba, respectively. Therefore, it can be concluded that a large amount of Ba was successfully doped into the Ba-HNSs.

## 5. X-ray diffraction spectra of HNPs

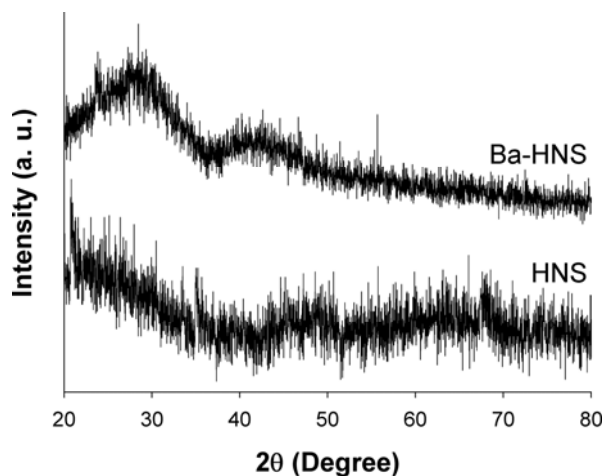

**Fig. S4** XRD patterns of the Ba-HNSs and the HNSs.

The crystallinity was analyzed by XRD. A broad decreased peak of the HNS between 20° and 40° showed the amorphous phase of SiO<sub>2</sub> NPs, whereas the other peaks couldn't analyzed clearly. Compared to HNS, new peaks originated from doped barium on TiO<sub>2</sub> and SiO<sub>2</sub> were shown in Ba-HNS. Therefore, X-ray diffraction (XRD) patterns confirm the existence of the doped barium on the Ba-HNSs. However, nature of both nanoparticles (HNS and Ba-HNS) is amorphous due to low reaction temperature and no calcination step, so that further analysis is needed for clarifying the molecular structure of the Ba-HNS.

## 6. Wide scan spectra of X-ray photoelectron spectroscopy

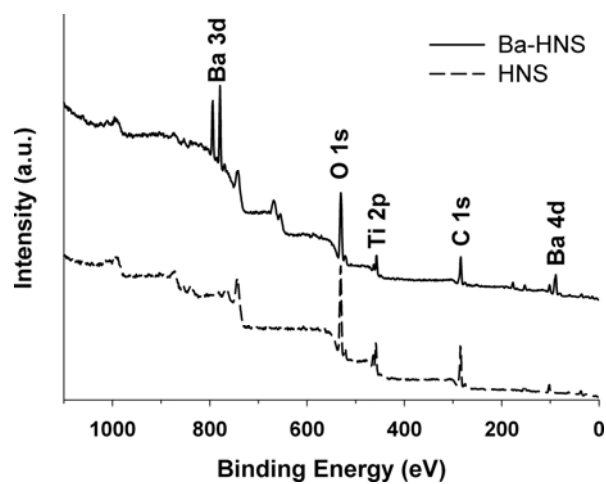

**Fig. S5** Full-scale X-ray photoelectron spectroscopy spectra of the Ba-HNSs.

To further clarify molecular structure of the Ba-HNSs, X-ray photoelectron spectroscopy (XPS) was conducted. A Ba 3d photoelectron spectrum is only shown in Ba-HNSs, which implies that barium was successfully doped on the Ba-HNSs.



## 7. Photograph of ER fluids

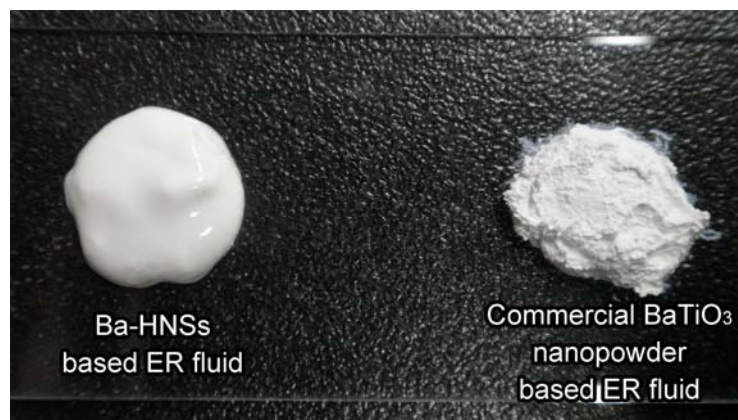

**Fig. S6** Photograph of ER fluids based on 25 vol% of Ba-HNSs and commercial BaTiO<sub>3</sub> nanopowders.

According to Fig. S6, the suspension of Ba-HNSs shows much better miscibility than that of commercial BaTiO<sub>3</sub> nanopowders. It was possible to increase volume fraction of the Ba-HNSs up to 25 vol%, while it was impossible for the BaTiO<sub>3</sub> nanopowders. Additionally, higher volume fraction of Ba-HNSs is possible than 25 vol%.

### 8. A TEM image of the commercial BaTiO<sub>3</sub> nanopowders

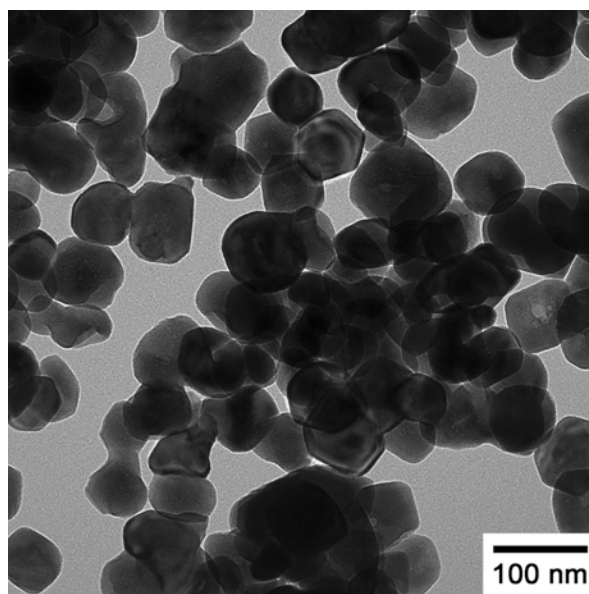

**Fig. S7** TEM image of the commercial BaTiO<sub>3</sub> nanopowders.

Compared to the Ba-HNSs, commercial BaTiO<sub>3</sub> nanopowders exhibit a large amount of agglomeration and low size uniformity.
